# Supplementary material for: Using rare earth elements (REE) to study the origin of ore-fluids associated with granite intrusions
Source: Preprints.org preprint supplement (doi:10.20944/preprints201906.0020.v1), 2019-06-03
Supplement: Supplementary file 1 [file supplementary]

## Sheet: Supplementart Table 1
Supplementary Table 1. Experimental REE fluid-granitic melt partition coefficients and chlorine molalities (unit in M) of fluids in equilibrium with granitic melts*.
Experiment	P (kb)	T (oC)	ASI												References
SP_1	4	800	1.1382	0.449						0.0084					[1]
SP_2	4	800	1.1382	0.646		0.0286			0.0613	0.0204			0.017		[1]
SP_3	4	800	1.1382	0.716		0.0333			0.069	0.0244			0.022		[1]
SP_4	4	800	1.1382	0.753		0.0417			0.098	0.037			0.023		[1]
SP_5	4	800	1.1382	0.86		0.0666			0.1587	0.0455			0.0303		[1]
SP_6	4	800	1.1382	0.896						0.05					[1]
SP_7	4	800	1.1382	0.914		0.0893			0.278	0.055			0.042		[1]
SP_8	1.25	800	1.1382	0.914		0.189			0.119	0.182			0.083		[1]
JN	4	800	0.994071	0.914		0.0143			0.017	0.014			0.0149		[1]
13	2	800	1.17968	0.677903	0.006125	0.00380952	0.00292308	0.00219512	0.00571429	0.00221239	0.00186047	0.00145161	0.00145604	0.00131481	[2]
16	2	800	1.17226	0.722282	0.00714286	0.00382166	0.00210445	0.00175	0.00451524	0.00137615	0.00163415	0.00138103	0.00129944	0.00125	[2]
17	2	800	1.29731	1.54514	0.114493	0.107263	0.101282	0.08	0.134006	0.0730159	0.0601471		0.037037	0.034	[2]
18	2	800	1.25055	1.54514	0.122667	0.117347	0.116867	0.09125	0.123684	0.08	0.0690141		0.03975	0.0331818	[2]
21	2	800	1.23504	4.06098	1.85507	1.8705	1.7134	1.42857	1.06838	1.17241	1.11349	0.866667	0.549407	0.489744	[2]
22	2	800	1.22917	4.35872	1.76923	1.68199	1.76471	1.37143	1.02717	1.22321	1.0625	0.823529	0.525581	0.423944	[2]
23	2	800	1.12474	4.35872	1.82825	1.66883	1.67183	1.35255	1.09524	1.12329	1.01852	0.802198	0.496429	0.457143	[2]
24	2	800	1.14306	4.24642	2.53086	2.50774	2.44928	2.06383	1.15	1.86567	1.53571	1.13043	0.753623	0.603306	[2]
25	2	800	1.23025	4.02414	2.10526	2.1372	2.16883	1.80769	1.07576	1.5	1.41176	1.10345	0.8	0.672727	[2]
105	2	800	1.11854	1.35825	0.0407666	0.0330556	0.0232759	0.023741	0.0396825	0.0225	0.0217544	0.02025	0.0151613	0.0142623	[2]
106	2	800	1.09418	1.32734	0.0713415	0.0706468	0.0650602	0.0598039	0.0659664	0.0558824	0.0467308	0.0372506	0.0269912	0.0232092	[2]
109	2	800	1.15198	1.38924	0.0381877	0.0367521	0.0257642	0.022695	0.03408	0.019337	0.0190972	0.0162288	0.0151908	0.0146939	[2]
110	2	800	1.09493	1.32734	0.0306233	0.0251799	0.0182482	0.0167164	0.0258784	0.0183333	0.0148936	0.0129455	0.0116667	0.0113063	[2]
A1_RQ	2	750	1.16	1.19411	0.02								0.004		[3]
B0_RQ	2	750	1.29	1.63537	0.13										[3]
B1_RQ	2	750	1.15	1.11879	0.015										[3]
C1_RQ	2	750	1.11	0.964313	0.06								0.06		[3]
D0_QR	2	750	1.32	1.69319	0.13										[3]
D1_RQ	2	750	1.17	0.97637	0.04										[3]
Note: the variables are explained in Table 1.

## Sheet: Supplementary Table 2
Supplementary Table 2. REE concentrations (ppm).
	1	2	3	4	5	6	7	8
La	30.9	25	3.05422	36.7447	12.7	23.7	20.2286	23.4061
Ce	51.2	52	6.0448	71.9242	25.8	47.2	48.0771	54.3348
Nd	13.7	29	1.4679	17.9837	12.1	17.1	21.6075	26.1481
Sm	4.2	3.9	0.396535	4.71772	2.17	3.2	3.2331	3.65428
Eu	1.08	0.9	0.00509158	0.41145	0.54	0.83	0.377878	1.05894
Gd	4.8	2.6	0.394687	4.73377	2.24	2.54	1.43141	3.27712
Tb	0.8	0.25	0.0601541	0.726116
Dy					2.25	1.77
Er					1.16	0.85
Yb	2.2	1.9	0.0975617	1.14199	1.1	0.69	0.746347	2.142
Lu	0.332	0.29	0.0124561	0.138616
*Notes:
1 - The Lake George granodiorite (data from [5])
2 - Mineralized quartz-feldspar porphyry (data from [26])
3 - Magmatic vapour phase with 1.23 M Cl- in equilibrium with granite melt
4 - Magmatic vapour phase with 3.02 M Cl- in equilibrium with granite melt
5 - The Bakircay granodiorite (data from [4])
6 - Potassic altered rock (data from [4])
7 - Calculated fluid with 3.50 M Cl- in equilibrium with granite melt
8 - Calculated fluid with threshold Cl- in equilibrium with granite melt
